# Supplementary material for: Active microrheology determines scale-dependent material properties of Chaetopterus mucus
Source: PLOS journal article supplement (doi:10.1371/journal.pone.0176732), 2017-05-31
Supplement: S1 (10.1371/journal.pone.0176732.s001) [file journal.pone.0176732.s001]

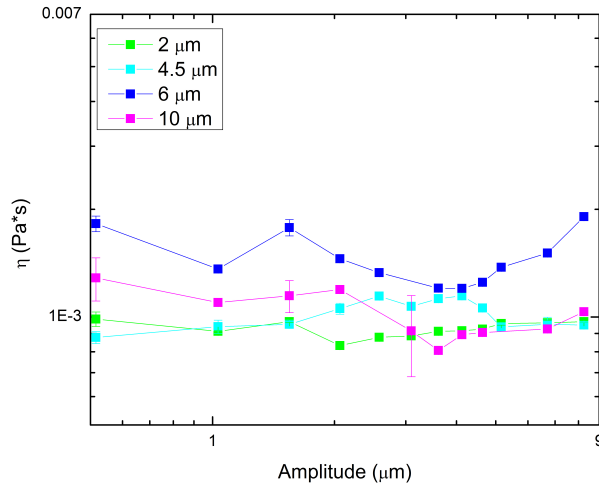

**S1 Figure: Active microrheology measurements of water viscosity measured for different probe sizes and different oscillation amplitudes.** Measurement techniques and instrumentation were identical to those shown in Figure 3 and described in Methods. As shown the measured viscosity of water is largely independent of probe size and oscillation amplitude as expected for a Newtonian fluid. Thus, the marked dependence on these parameters in mucus reflects the lengthscale-dependent rheology and structure of the mucus rather than any systematic instrumentation or measurement errors. Error bars also show that our instrument/measurement error is  $\sim 2.6\%$  which is well below the measured  $\sim 20\%$  range among different data trials in mucus.
